# Supplementary material
Source: MDPI journal article supplement (https://www.mdpi.com/1424-8247/15/5/623)
Supplement: s1 [file s1]

**Nitro-Group Containing Thiopeptide Derivatives as a Promising Agents to Target *Clostridioides difficile***

**Dahyun Kim <sup>1,†</sup>, Young-Rok Kim <sup>2,†</sup>, Hee-Jong Hwang <sup>1</sup>, Marco A. Ciufolini <sup>3</sup>, Jusuk Lee <sup>1</sup>, Hakyong Lee <sup>1</sup>, Shyaka Clovis <sup>1</sup>, Sung Ji Jung <sup>2</sup>, Young-Jin Son <sup>1,\*</sup>, Jin-Hwan Kwak <sup>2,\*</sup>**

<sup>1</sup>A&J Science Co., Ltd., 80 Chumbok Ro, Dong Gu, Daegu, 41061, Republic of Korea

<sup>2</sup> School of Life Science, Handong Global University, 558 Handong Ro, Heunghae-eup, Buk-gu, Pohang, 37554, Republic of Korea

<sup>3</sup> Department of Chemistry, University of British Columbia, 2036 Main Mall, Vancouver, BC, V6K 1Z1, Canada

# Supporting Information

***<sup>1</sup>H and <sup>13</sup>C NMR Spectra***

**Table of Contents**

|                                                                   |     |
|-------------------------------------------------------------------|-----|
| Figure S1: <sup>1</sup> H NMR Spectrum of compound <b>2</b>       | P3  |
| Figure S2: <sup>13</sup> C NMR Spectrum of compound <b>2</b>      | P4  |
| Figure S3: <sup>1</sup> H NMR Spectrum of compound <b>3</b>       | P5  |
| Figure S4: <sup>13</sup> C NMR Spectrum of compound <b>3</b>      | P6  |
| Figure S5: <sup>1</sup> H NMR Spectrum of compound <b>4</b>       | P7  |
| Figure S6: <sup>13</sup> C NMR Spectrum of compound <b>4</b>      | P8  |
| Figure S7: <sup>1</sup> H NMR Spectrum of compound <b>AJ-024</b>  | P9  |
| Figure S8: <sup>13</sup> C NMR Spectrum of compound <b>AJ-024</b> | P10 |
| Figure S9:HPLC chromatogram of compound <b>AJ-024</b>             | P11 |

<sup>1</sup>H NMR CDCl<sub>3</sub> (D:\DATA\NJS) nmrsu 7

ouse Sensitivity: 1.0

.962 ppm / 3986.235 Hz

um = 11.7412

EFINE REGION MODE

efine: Drag using left mouse button

eturn: Left-click highlighted icon

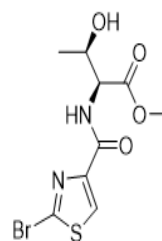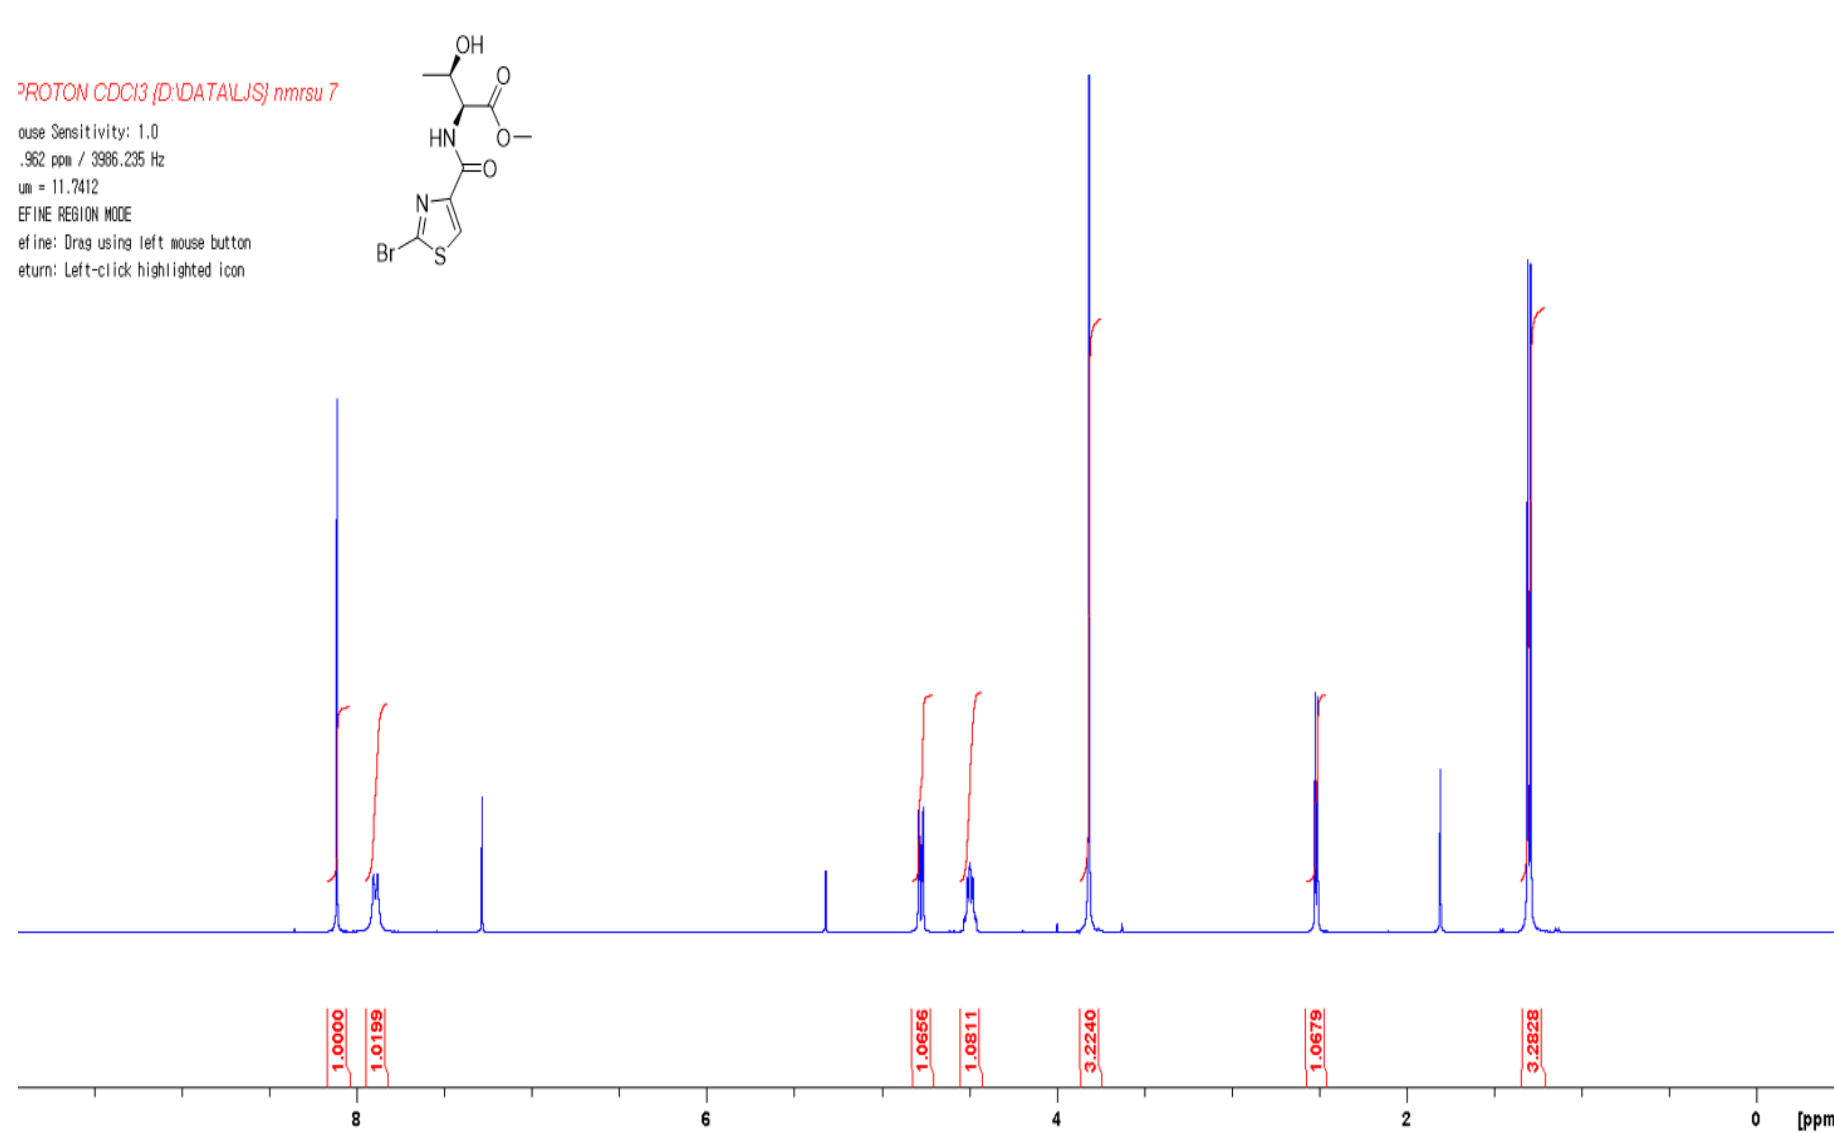

Figure S1: <sup>1</sup>H-NMR Spectrum of compound **2** (400 MHz, CDCl<sub>3</sub>)

C:\3CPD CDC13 {D:\DATA\LS} nmrsu 7

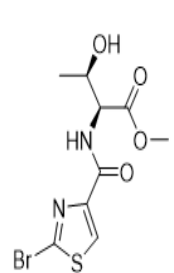

171.0336

160.1585

149.1802

136.1443

127.7074

68.0211

57.3647

52.7604

19.9659

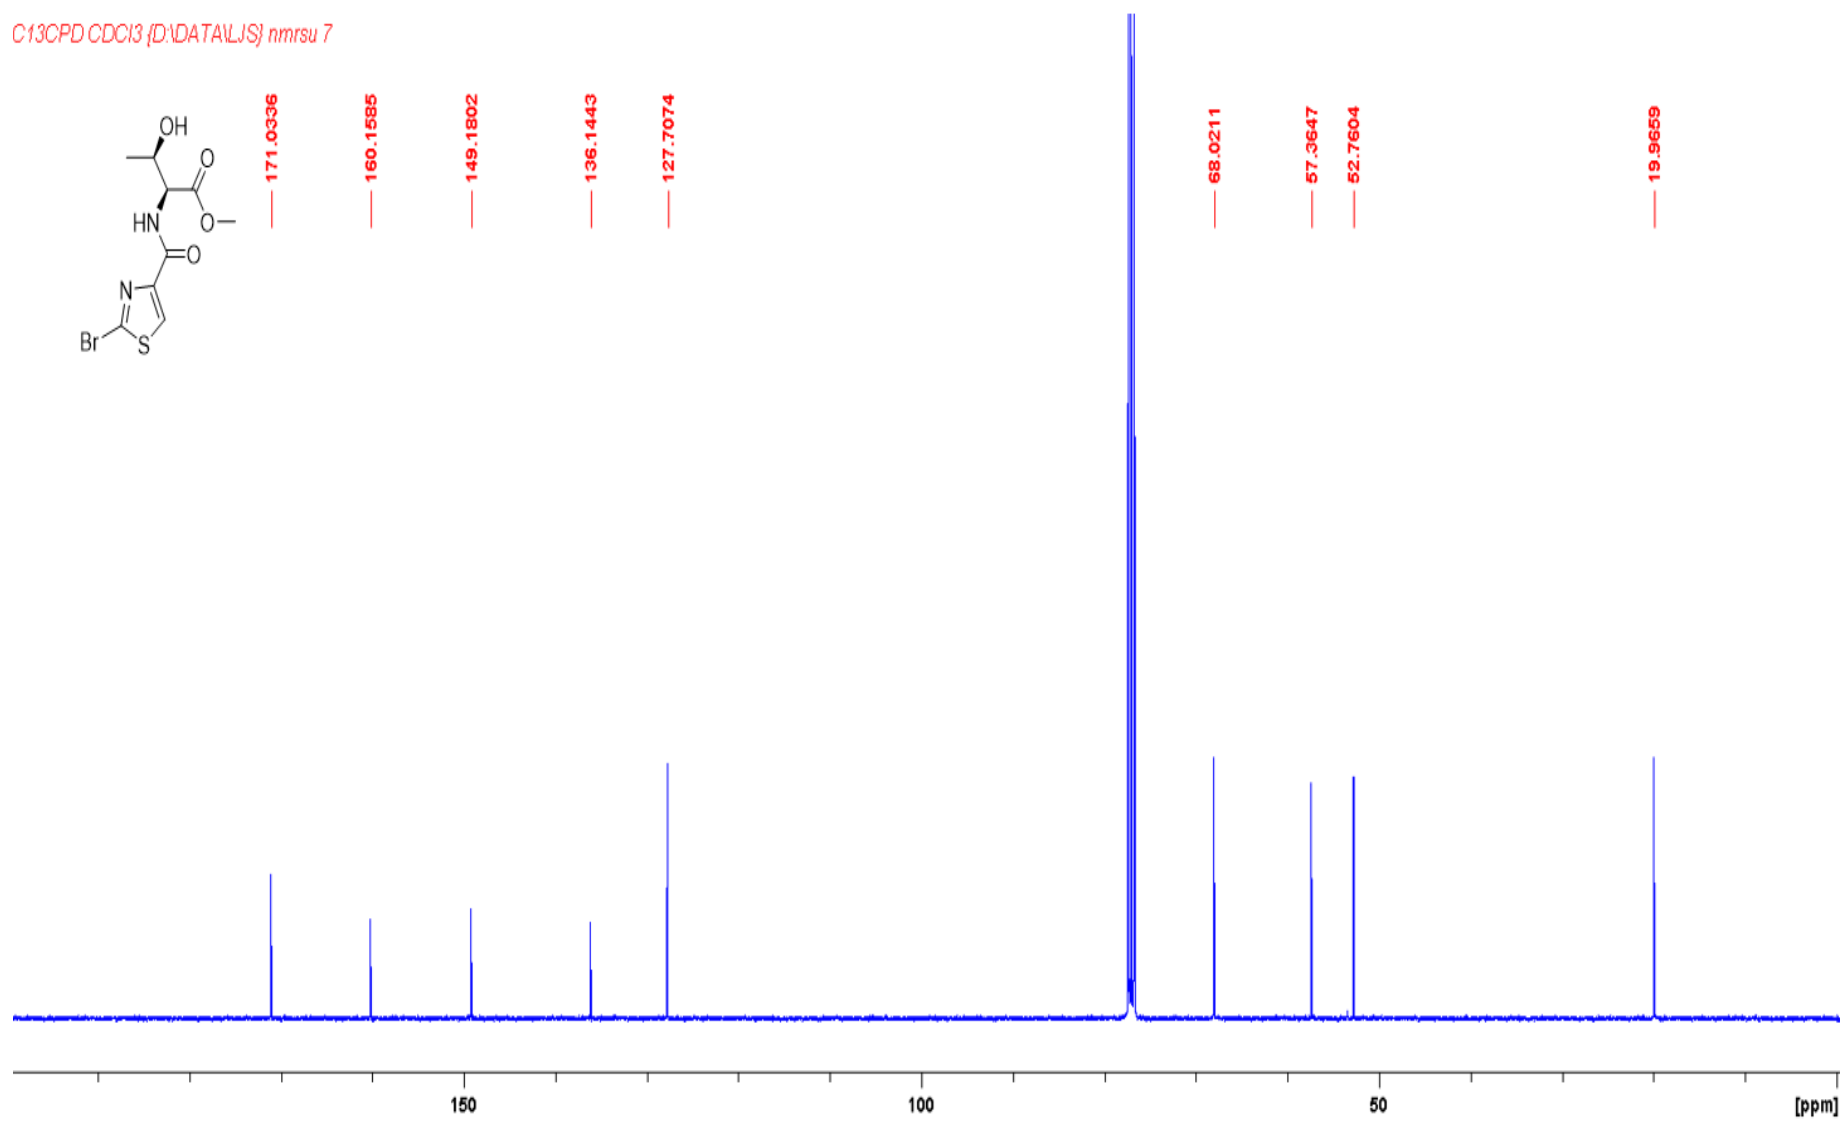

Figure S2: <sup>13</sup>C-NMR Spectrum of compound 2 (101 MHz, CDCl<sub>3</sub>)

PROTON DMSO (D:\DATA\LJS) nmrsu 2

Mouse Sensitivity: 1.0

9.988 ppm / 3996.359 Hz

Sum = 17.6588

DEFINE REGION MODE

Define: Drag using left mouse button

Return: Left-click highlighted icon

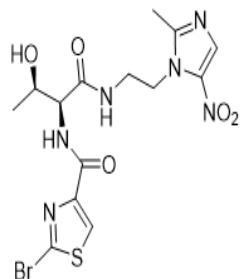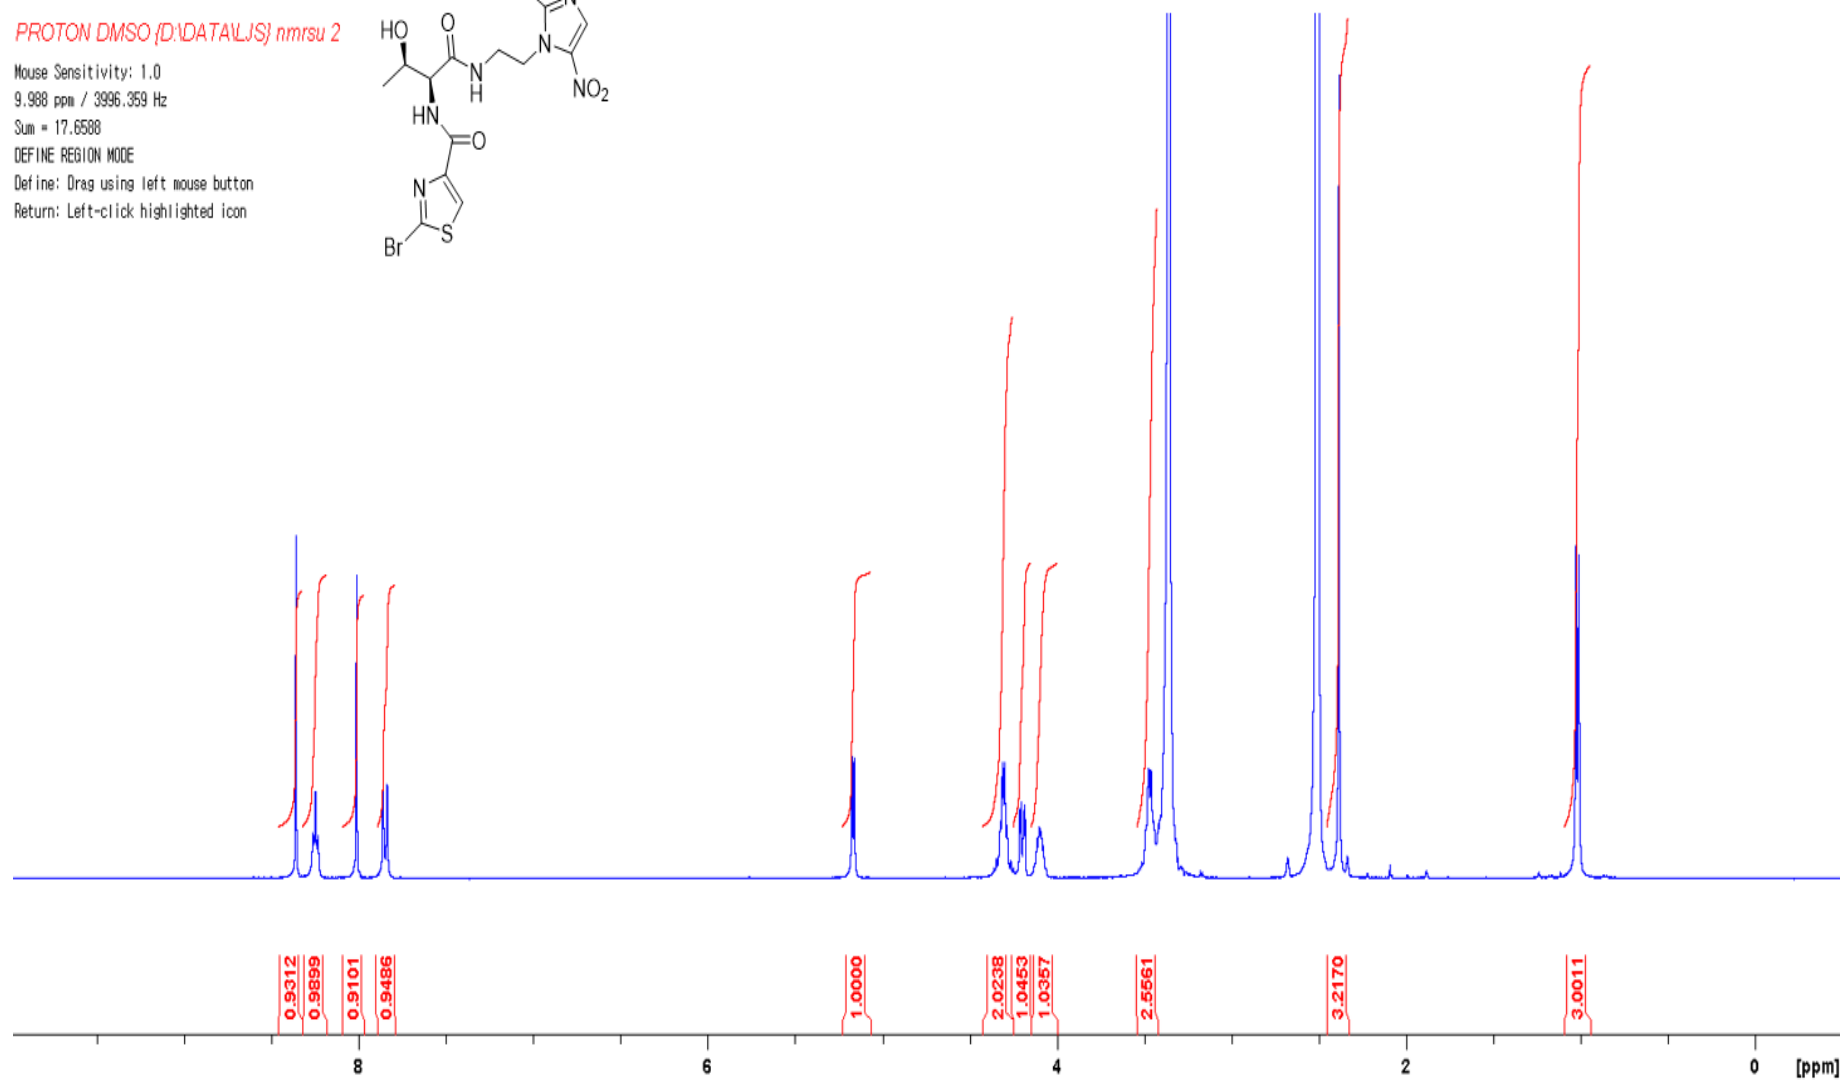

Figure S3: <sup>1</sup>H-NMR Spectrum of compound 3 (400 MHz, DMSO-*d*<sub>6</sub>)

213CPD DMSO (D:\DATA\JS) nmrsu 2

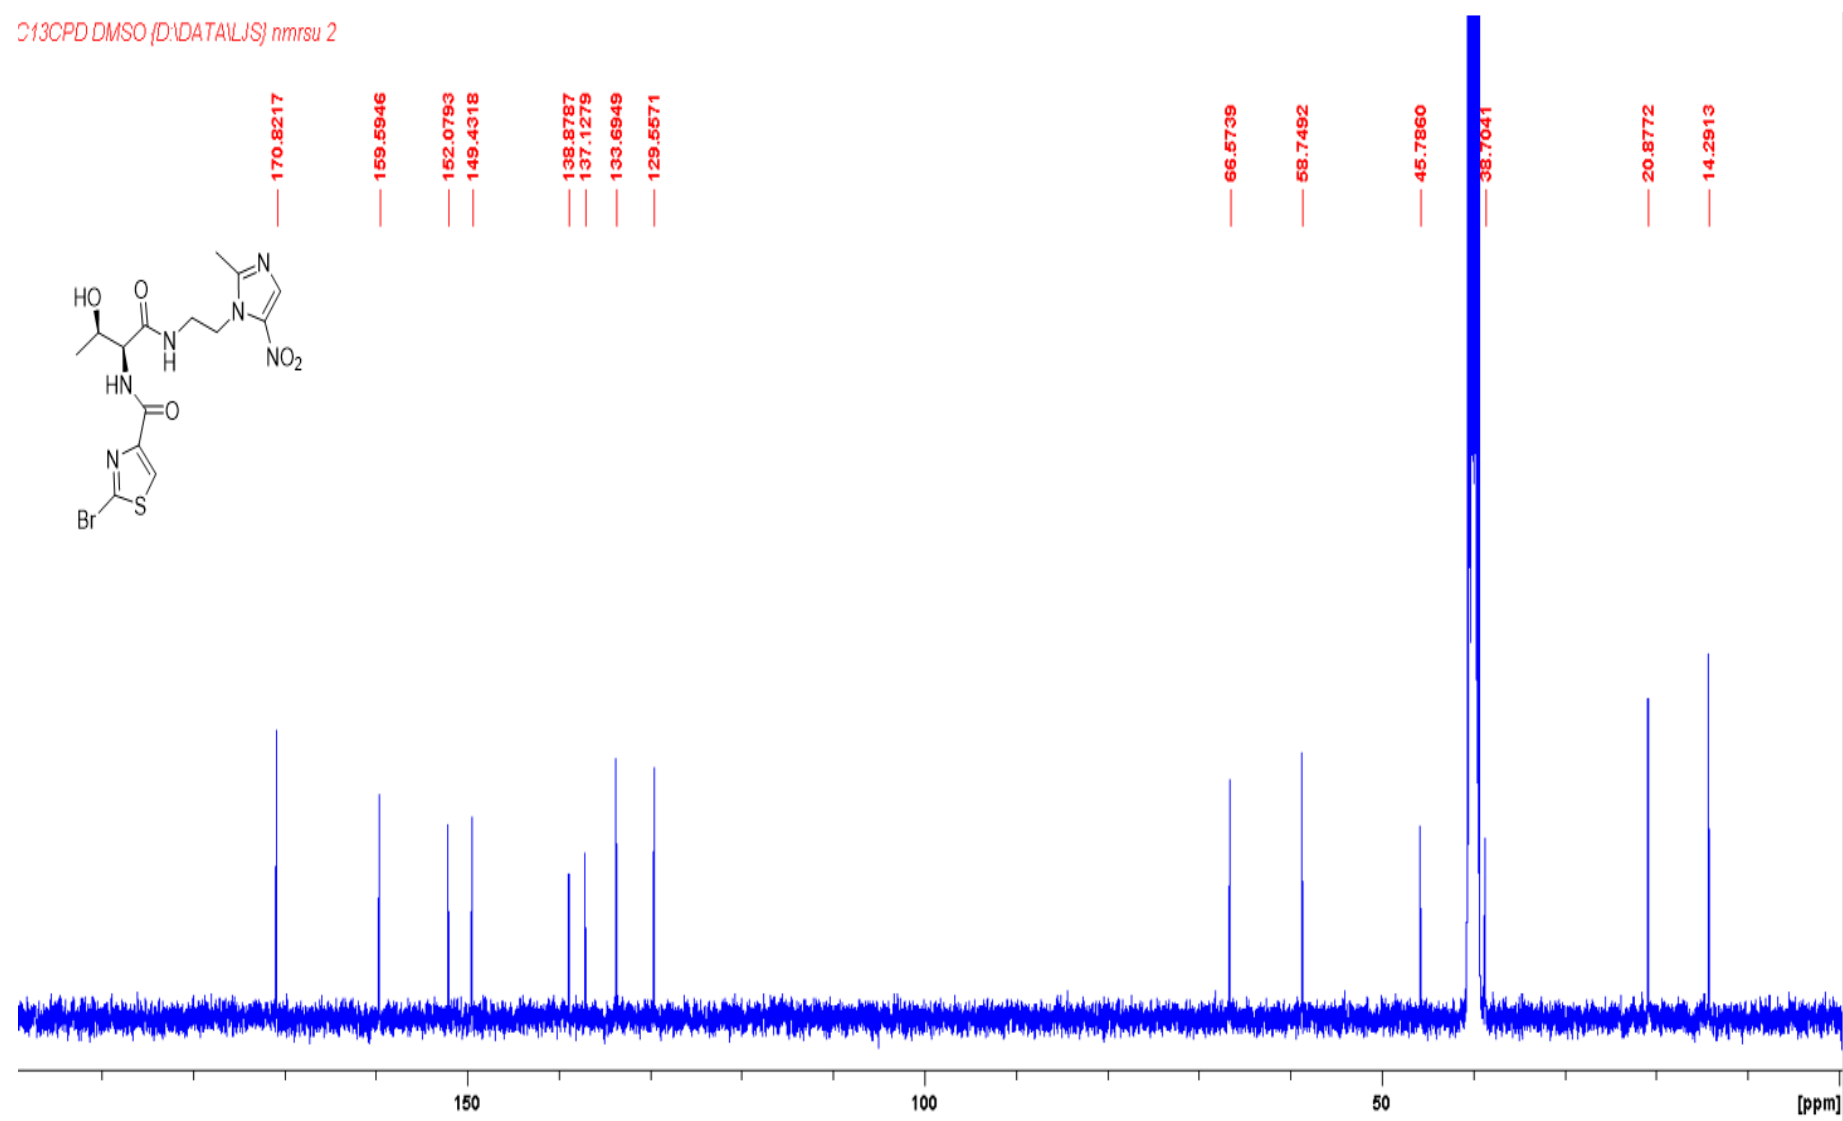

Figure S4: <sup>13</sup>C-NMR Spectrum of compound 3 (101 MHz, DMSO-*d*<sub>6</sub>)

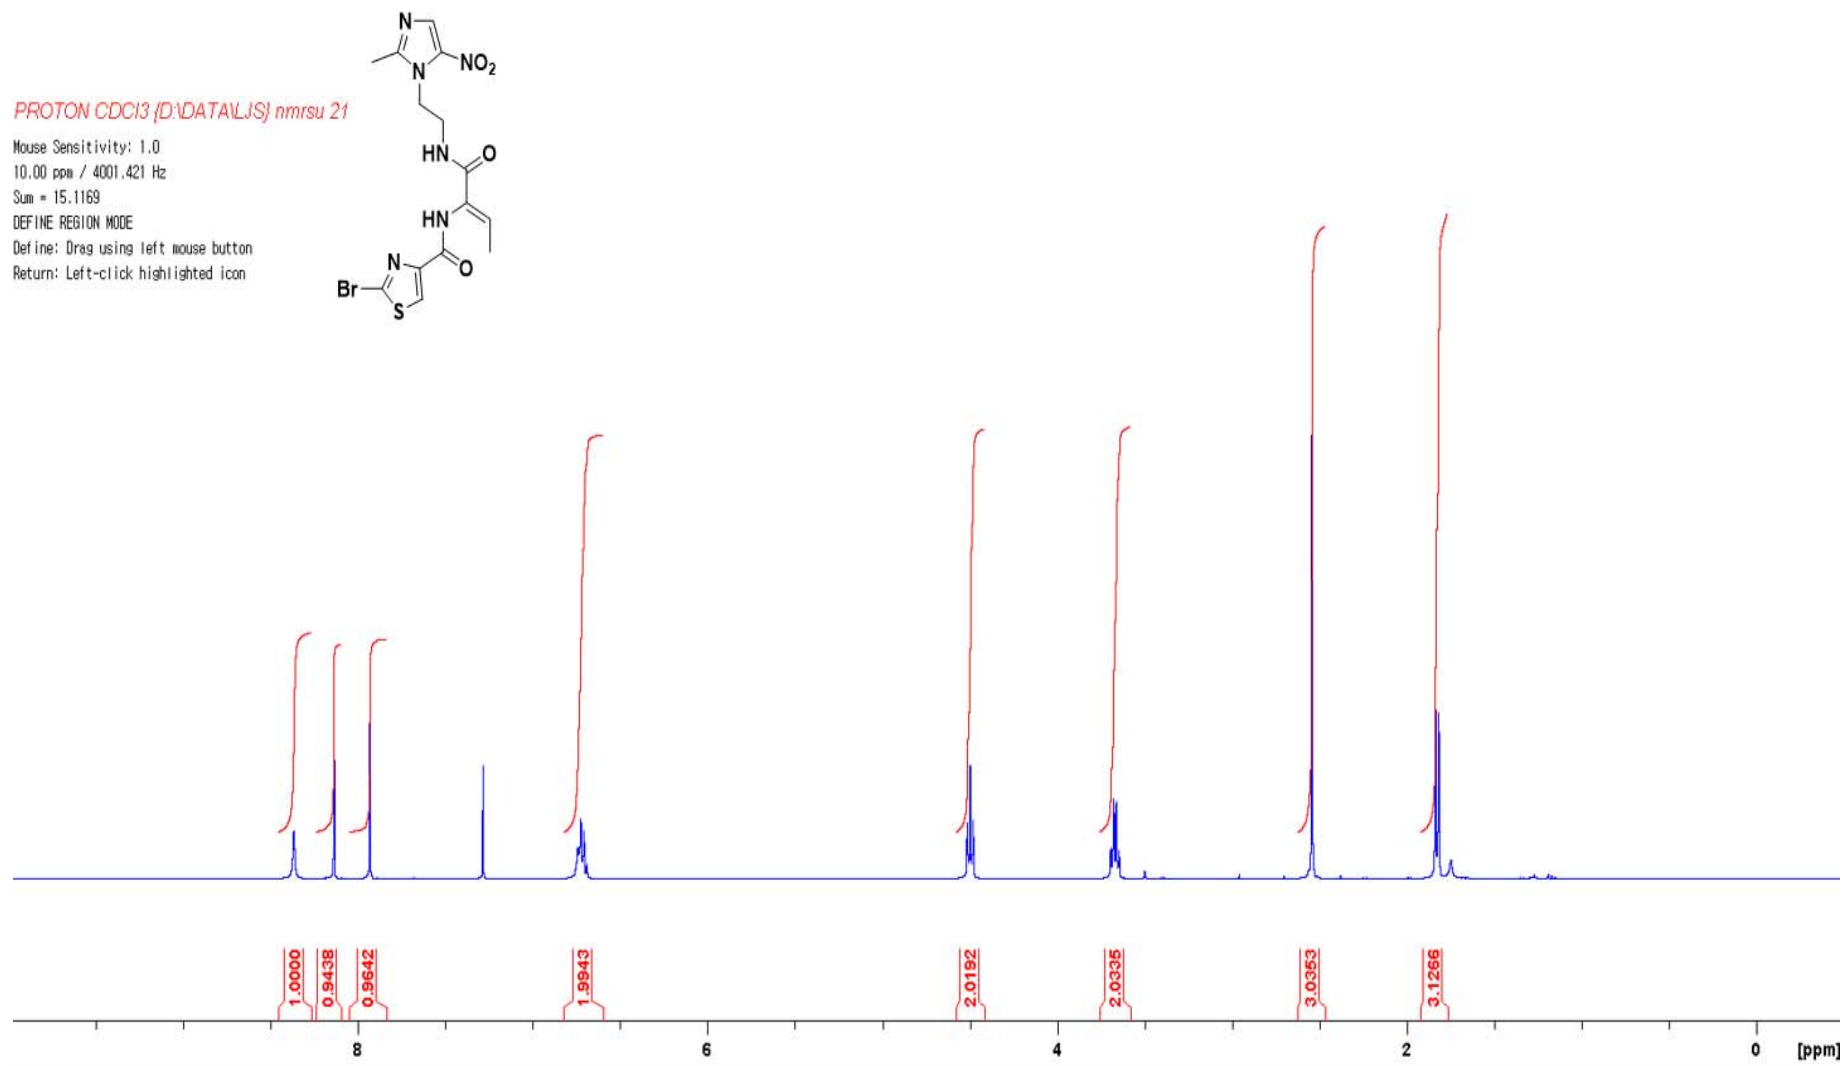

Figure S5:  $^1\text{H}$ -NMR Spectrum of compound **4** (400 MHz,  $\text{CDCl}_3$ )

C:\CPD CDC\3 {D:\DATA\LS} nmrsu 21

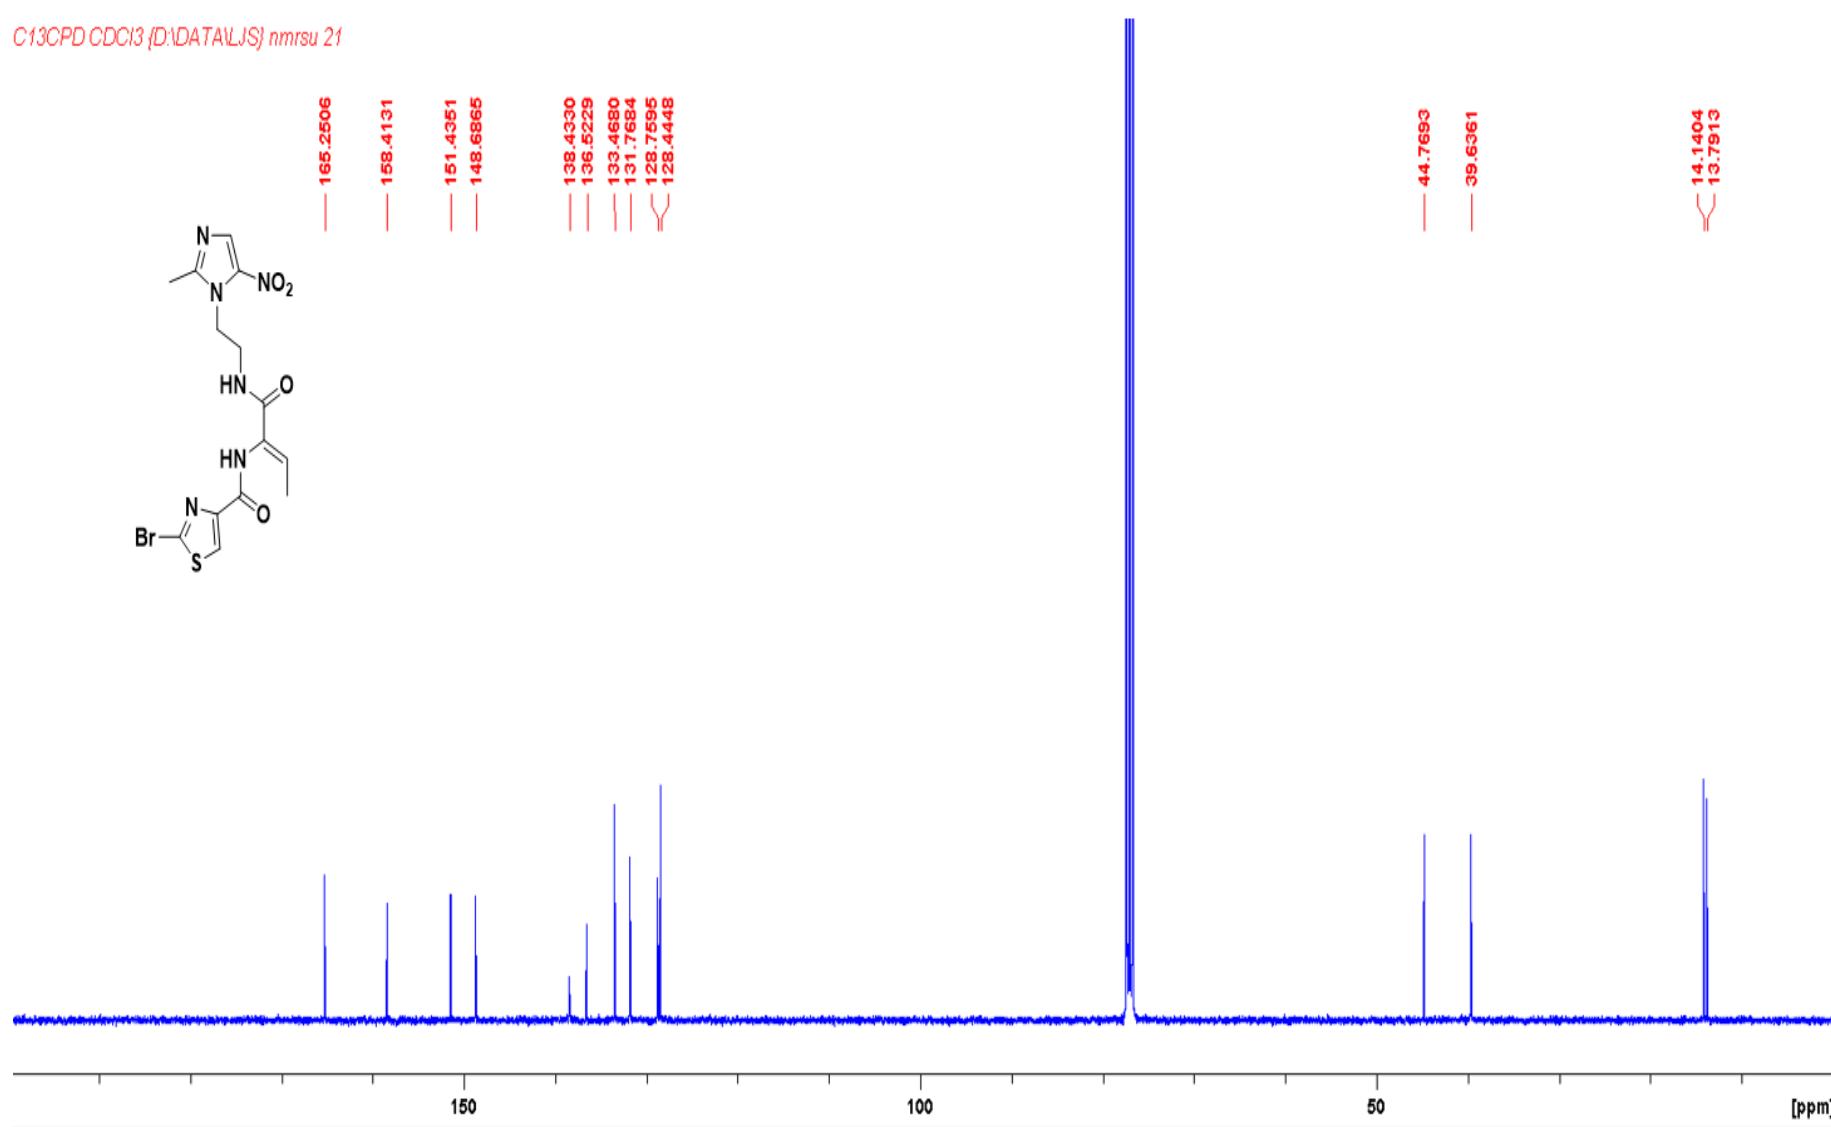

Figure S6: <sup>13</sup>C-NMR Spectrum of compound 4 (101 MHz, CDCl<sub>3</sub>)



```
Mouse Sensitivity: 1.0
10.00 ppm / 4001,421 Hz
Sum = 50.7026
DEFINE REGION MODE
Define: Drag using left mouse button
Return: Left-click highlighted icon
```

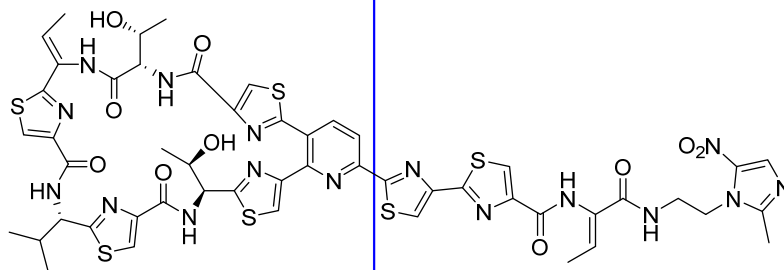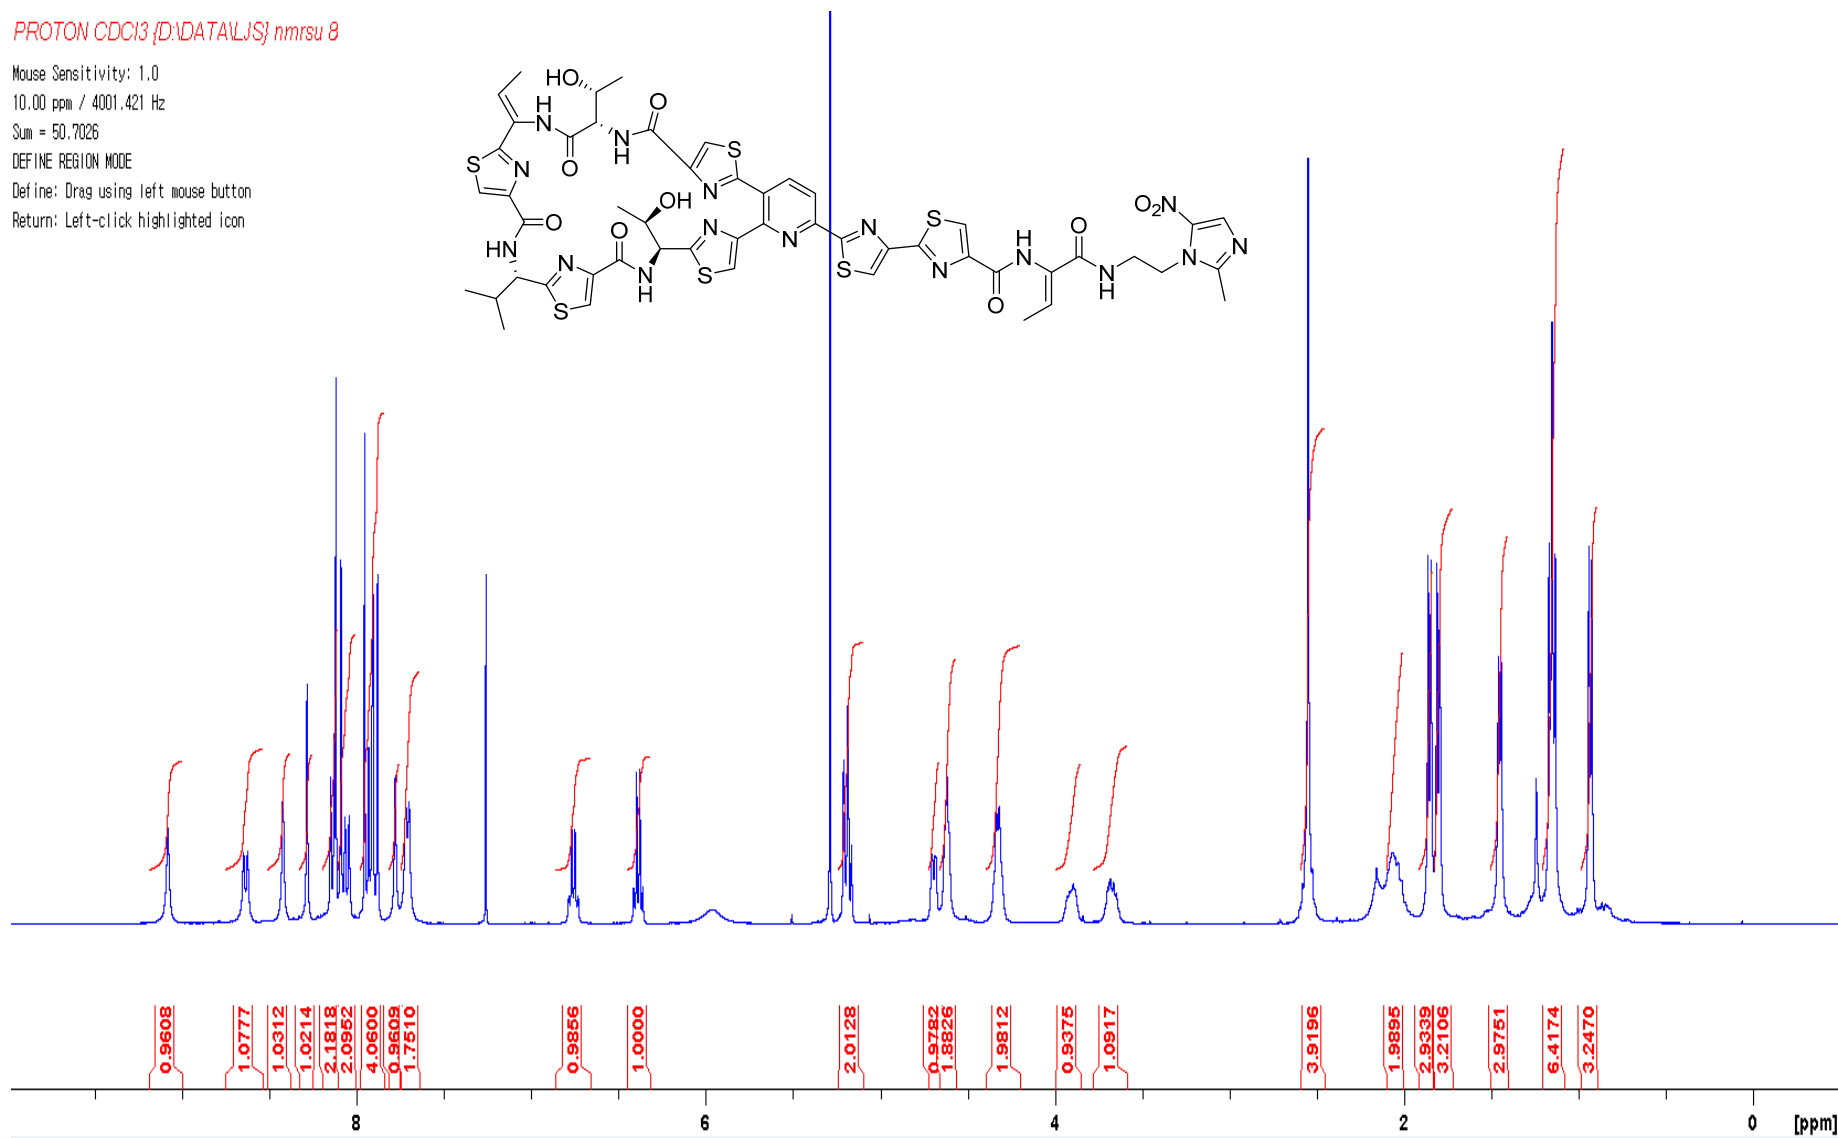

Figure S7: <sup>1</sup>H-NMR Spectrum of compound **AJ-024** (400 MHz, CDCl<sub>3</sub>)

C13CPD CDCI3 [D:\DATA\IJS] nmrsu 8

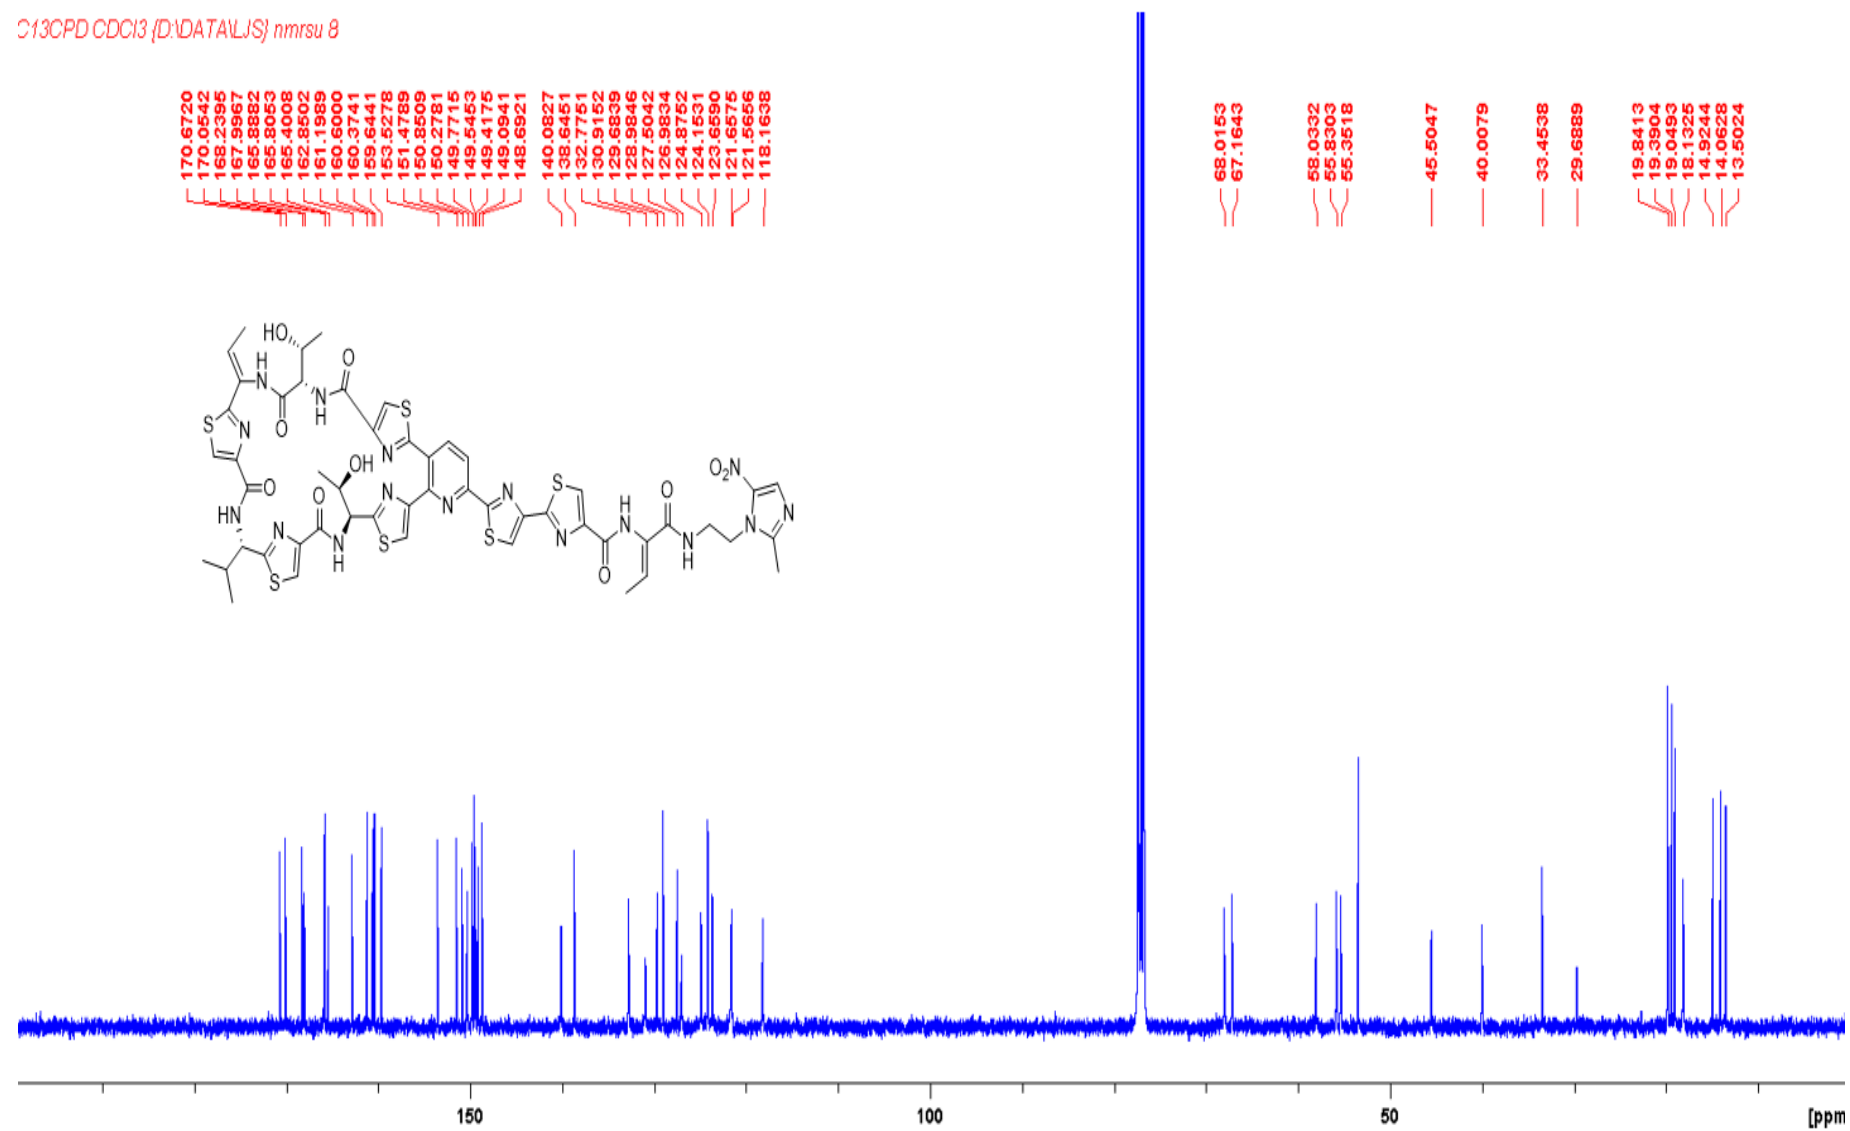

Figure S8:  $^{13}\text{C}$ -NMR Spectrum of compound AJ-024 (101 MHz,  $\text{CDCl}_3$ )

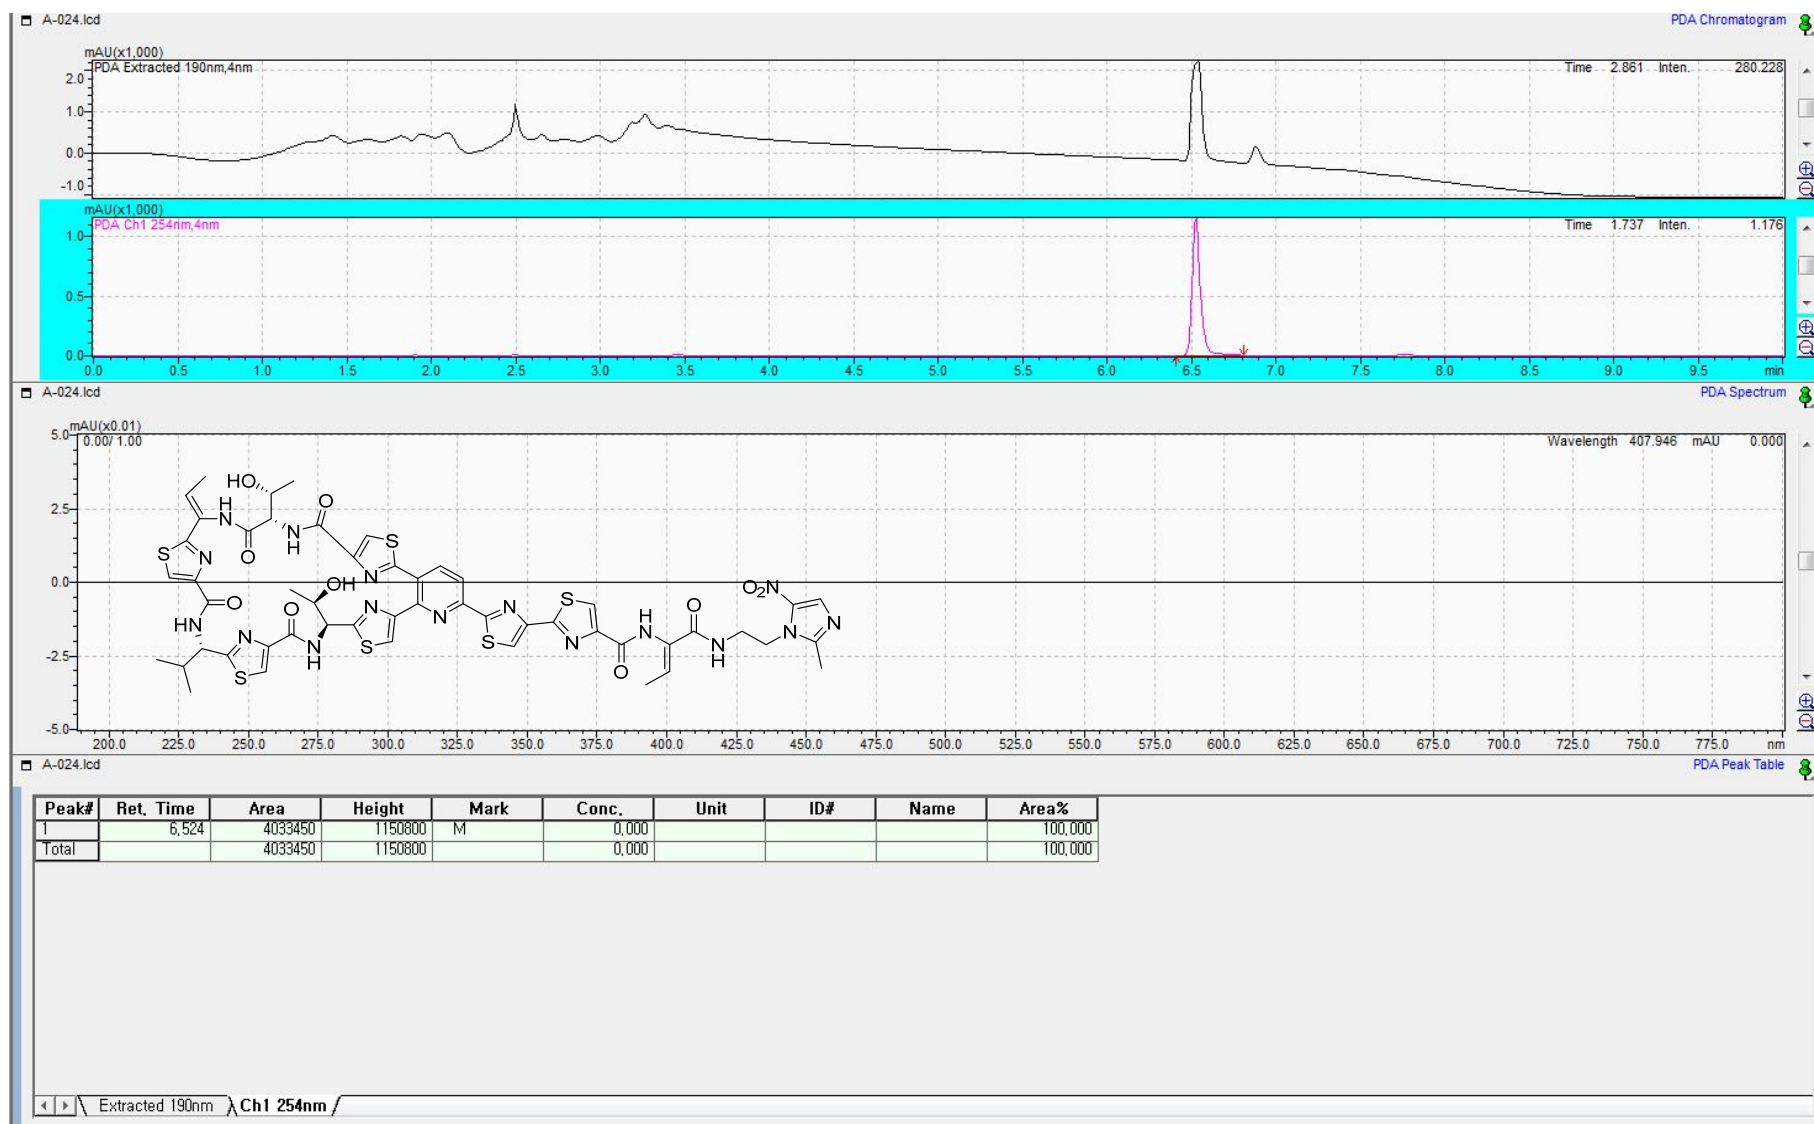

Figure S9:HPLC chromatogram of compound **AJ-024**
